# Supplementary material for: Genome-wide specificity of DNA binding, gene regulation, and chromatin remodeling by TALE- and CRISPR/Cas9-based transcriptional activators
Source: HighWire-hosted journal article supplement (doi:10.1101/gr.179044.114), 2015-05-29
Supplement: Supplemental_Tables.xlsx [file Supplemental_Tables.xlsx]

## Sheet: ST1
IL1RN
	Target Sequence	Distance to TSS (bp)
gRNA A	TGTACTCTCTGAGGTGCTCT	28
gRNA B	CATCAAGTCAGCCATCAGC	112
gRNA C	GAGTCACCCTCCTGGAAAC	144
gRNA D	ACGCAGATAAGAACCAGTT	179
TALE A	GGGCTCCTCCTTGTACT	39
TALE B	GGCATCAAGTCAGCCAT	114
TALE C	AGCCTGAGTCACCCTCCT	149
TALE D	ACGCAGATAAGAACCAGT	179
HBG1
	Target Sequence	Distance to TSS (bp)
gRNA A	GCTAGGGATGAAGAATAAA	26
gRNA B	TTGACCAATAGCCTTGACA	101
gRNA C	TGCAAATATCTGTCTGAAA	163
gRNA D	AAATTAGCAGTATCCTCTT	209
TALE A	GGCTAGGGATGAAGAAT	29
TALE B	GCCTTGACCAATAGCCTT	105
TALE C	CTGTCTGAAACGGTCCCT	155
TALE D	ATCCTCTTGGGGGCCCCT	199
Supplemental Table 1. Target sequences of gRNAs and TALEs and distance to transcriptional start site (TSS).

## Sheet: ST2
TALE-VP64 Activation of IL1RN
TALE(s)	rep 1	rep 2	rep 3	rep 4		avg	sterr
A	34.3371	24.619	30.9501	44.0746		33.4952	4.06096
B	85.136	75.1498	171.477	139.283		117.762	22.7829
C	14.5374	26.0227	31.8203	35.3068		26.9218	4.5505
D	16.0188	23.291	21.8851	16.8173		19.503	1.81143
A+B	3472.35	5.58554	1654.15	2307.12		1859.8	723.465
A+C	576.708	695.399	534.436	557.132		590.919	35.8817
A+D	218.532	202.489	239.167	280.503		235.173	16.8721
B+C	25918.6	28958.5	27022.5	32135.4		28508.7	1362.37
B+D	1039.52	750.495	1953.54	1575.81		1329.84	269.17
C+D	2064.67	2524.35	3570.41	3496.93		2914.09	370.12
A+B+C	45126.8	47699.9	37170.6	28170		39541.8	4403.47
A+B+D	5226.75	4274.97	6993.87	6570.9		5766.62	623.798
A+C+D	4678.07	5083.82	4582.36	7392.64		5434.22	661.792
B+C+D	59545.2	55173.9	64717.8	75903.3		63835	4470.64
A+B+C+D	53294.5	55944.1	53301	43293.8		51458.3	2792.06
Supplemental Table 2. Relative Gene Expression Normalized to GAPDH and Mock-Transfected Control

## Sheet: ST3
dCas9-VP64 Activation of IL1RN
gRNA(s)	rep 1	rep 2	rep 3	rep 4		avg	sterr
A	1.36457	0.565833	6.54725	11.7199		5.04939	2.58875
B	44.8939	41.5982	85.0883	62.7215		58.5755	9.98137
C	14.8095	25.0797	62.2883	61.0064		40.796	12.2225
D	26.5097	21.3838	34.797	35.5281		29.5546	3.40585
A+B	213.553	120.13	635.122	724.524		423.332	150.419
A+C	401.275	448.34	760.545	643.988		563.537	84.1049
A+D	67.5764	43.0651	167.834	286.202		141.169	55.3668
B+C	6693.05	4832.15	8254.07	7037.7		6704.24	708.168
B+D	2756.17	2680.8	3745.36	4042.1		3306.11	344.972
C+D	16480.2	9597.54	18190.4	24002.4		17067.6	2965.05
A+B+C	7375.11	5436.45	8369.29	5598.75		6694.9	710.135
A+B+D	3765.04	2974.53	4042.1	3446.44		3557.03	229.145
A+C+D	4865.76	5949.07	13408.8	13042.1		9316.42	2268.91
B+C+D	29912.2	32282.1	51450.2	44790		39608.6	5121.58
A+B+C+D	14852.8	10005.1	20044.1	12253.4		14288.8	2158.98
Supplemental Table 3. Relative Gene Expression Normalized to GAPDH and Mock-Transfected Control

## Sheet: ST4
TALE-VP64 Activation of HBG1/2
TALE(s)	rep 1	rep 2	rep 3	rep 4		avg	sterr
A	5.4809	5.04345	10.157	10.5884		7.81744	1.4806
B	499.525	307.494	992.147	805.873		651.26	153.109
C	39.2443	41.482	18.9537	39.2443		34.7311	5.28549
D	142.46	160.276	182.836	130.184		153.939	11.4429
A+B	1238.53	1514.28	2376.15	1578.58		1676.88	244.478
A+C	999.049	672.976	736.432	1383.79		948.062	161.482
A+D	706.435	965.018	783.837	1078.2		883.372	84.5765
B+C	53766.2	116052	63058.8	33558.9		66609	17593.7
B+D	49819.1	35472.5	40747.1	52659.6		44674.6	3982.58
C+D	38018.5	30455.4	22140.6	27638.8		29563.3	3305.11
A+B+C	46161.8	46806.2	54140.1	38549.1		46414.3	3185.47
A+B+D	34264.1	28024.7	25967.3	29622.6		29469.7	1764.58
A+C+D	47459.6	49819.1	41603.3	51219.6		47525.4	2121.02
B+C+D	451514	302047	511512	393065		414535	44615.6
A+B+C+D	113664	248763	91052.4	270339		180954	45823.9
Supplemental Table 4. Relative Gene Expression Normalized to GAPDH and Mock-Transfected Control

## Sheet: ST5
dCas9-VP64 Activation of HBG1/2
gRNA(s)	rep 1	rep 2	rep 3	rep 4		avg	sterr
A	4.55419	7.14629	2.85783	4.15521		4.67838	0.8988
B	0.636042	1.77423	1.0533	1.58548		1.26227	0.258586
C	1.9148	1.44112	1.23535	0.630655		1.30548	0.266142
D	1.6902	2.19953	0.639458	0.685354		1.30364	0.384649
A+B	15.1075	21.8142	8.31042	13.8799		14.778	2.77267
A+C	12.1864	10.0366	4.54702	3.28279		7.51318	2.13893
A+D	40.9898	33.5257	6.75016	3.02078		21.0716	9.49902
B+C	1.42128	1.94153	1.59651	2.40314		1.84062	0.216419
B+D	2.34111	2.9023	2.10661	0.809398		2.03985	0.442817
C+D	34.2301	16.647	6.43046	7.33564		16.1608	6.45045
A+B+C	47.085	33.7589	17.9377	21.9313		30.1782	6.56062
A+B+D	32.6089	45.7974	30.1675	21.9313		32.6263	4.94896
A+C+D	83.1241	100.232	42.6633	30.1675		64.0466	16.5286
B+C+D	10.4628	4.30853	4.12651	7.64715		6.63624	1.51056
A+B+C+D	58.3716	58.3716	42.3686	24.5036		45.9038	8.06927
Supplemental Table 5. Relative Gene Expression Normalized to GAPDH and Mock-Transfected Control

## Sheet: ST6
Rank	Gene	baseMean	log2FoldChange	lfcSE	pvalue	padj
1	NM_000577	75.816	1.70674	0.347522	9.05347e-07	0.0350433
2	NM_173843	69.5839	1.52095	0.341096	8.23387e-06	0.159354
3	NM_173842	70.4747	1.37115	0.343427	6.53649e-05	0.843359
4	NM_173841	72.0316	1.34252	0.343109	9.12356e-05	0.882865
5	NM_002152	31.052	1.05491	0.352625	0.00277536	0.999984
6	NM_032747	364.858	0.931339	0.35368	0.00845649	0.999984
7	NM_004541	1596.63	0.910736	0.362331	0.0119522	0.999984
8	NM_181720	53.5701	-0.849761	0.342764	0.0131698	0.999984
9	NM_001885	57.6063	0.823091	0.333534	0.0135951	0.999984
10	NM_001258338	437.469	0.877849	0.356852	0.0138943	0.999984
11	NM_001206426	410.753	0.867493	0.35301	0.013994	0.999984
12	NM_005694	1645.26	0.851195	0.346798	0.0141103	0.999984
13	NM_003094	3525.18	0.877876	0.357706	0.0141205	0.999984
14	NM_018838	661.085	0.883999	0.360936	0.0143181	0.999984
15	NM_001033505	211.36	0.865467	0.353569	0.0143731	0.999984
16	NM_001206427	431.023	0.867244	0.358515	0.0155637	0.999984
17	NR_024412	872.471	0.848362	0.354347	0.0166586	0.999984
18	NM_001033506	211.226	0.841504	0.352759	0.0170562	0.999984
19	NR_046452	42.2523	0.836297	0.351928	0.0174857	0.999984
20	NM_002157	2609.71	0.825793	0.350282	0.018398	0.999984
Supplemental Table 6. Top 20 changes in gene expression in response to the IL1RN-targeted TALE-VP64 proteins, as determined by RNA-seq and ranked by pvalue. The top four transcripts are four isoforms of the IL1RN gene.

## Sheet: ST7
Rank	Gene	baseMean log2	FoldChange	lfcSE	pvalue	padj
1	NM_000184	297.482	6.31496	0.756859	7.20394e-17	2.78843e-12
2	NM_000559	229.984	6.03345	0.761773	2.3698e-15	4.5864e-11
3	NM_152228	15.0237	1.77757	0.564482	0.00163809	0.990936
4	NM_173689	17.3584	1.7771	0.584742	0.00237274	0.990936
5	NM_001004334	16.5933	1.76634	0.582608	0.00243112	0.990936
6	NM_001190228	12.3487	1.63323	0.546388	0.00279765	0.990936
7	NM_001002034	7.89184	1.66796	0.558832	0.00283826	0.990936
8	NM_033068	7.3132	1.61959	0.544221	0.00292052	0.990936
9	NM_001164716	18.3511	1.67531	0.581517	0.00396507	0.990936
10	NM_001199824	3.54667	1.35408	0.472844	0.00418725	0.990936
11	NM_001080400	141.213	1.6678	0.583549	0.00426279	0.990936
12	NM_198688	4.6122	1.42896	0.511044	0.00517144	0.990936
13	NM_175882	2.38777	1.14301	0.42087	0.00661097	0.990936
14	NM_017509	3.63438	1.26273	0.46975	0.00718593	0.990936
15	NM_178471	3.63438	1.26273	0.46975	0.00718593	0.990936
16	NR_044995	7.32092	1.48335	0.555566	0.00758544	0.990936
17	NM_005609	19.5439	1.54654	0.582938	0.00797769	0.990936
18	NM_080877	5.75283	1.34791	0.512151	0.00849178	0.990936
19	NM_001025598	35.8929	1.54043	0.585509	0.00851551	0.990936
20	NM_053284	17.8954	1.52609	0.581468	0.00867652	0.990936
Supplemental Table 7. Top 20 changes in gene expression in response to the HBG1/2-targeted TALE-VP64 proteins, as determined by RNA-seq and ranked by pvalue. The top two transcripts are the HBG1 and HBG2 genes.

## Sheet: ST8
	ChIP-Seq Data					Motif Search
site #	chr	start	stop	fold increase	pvalue	Best fit to TALE A	# matches	Best fit to TALE B	# matches	Best fit to TALE C	# matches	Best fit to TALE D	# matches
1	chr17	79451266	79451650	16.0183	4.1895e-05	GGACTGCGACCTGAACT	11	GACCTGAACTCGGCTCT	10	CGCCACAGGCGCCCTCCC	12	ATGCAGAAACGGTCCCGT	12
2	chr9	108006484	108006817	15.5898	1.21747e-05	GGGCCCGGCCTTGTTCT	13	GGCACCGAGGCAGCTCT	12	AGACCGCGTTGCCCTCCA	12	AGGCAGCCAAAGACCGGG	11
3	chr7	1609545	1609880	12.5055	1.20155e-05	AGGCGCCCCCAAGCCCT	10	CTCACCAAGCCGGCGCC	9	GGCCCGGGACCCCCACGA	10	CGGCAGCGCGGAACCCGA	10
4	chr13	52768446	52768775	12.0859	9.95673e-05	GCGCTCCTGGTTGGCTT	11	GGGAACAAGCCAGACCG	11	GGGCGGAGCCAGCTACCT	11	ACACAGTTACCCACCCCT	11
5	chr2	232650972	232651286	11.0363	3.30731e-07	TAGCTCCTACCTGTCCA	11	GGGAACCAGGCGGGGAG	9	TCGCTGGCTCGGCCTCCC	10	AGACAGAAAAGCGCCGGA	11
6	chr4	106629724	106630035	9.18996	4.45181e-11	GGCCTCCTGGAGGCTCG	9	AGCCTCCAGGAGGCCAG	10	ATGCTGAGCGACTCTGCT	12	AAGCAGGAAAACAAAGGT	10
7	chr8	56685795	56686169	8.6083	7.18233e-05	GAGCTGCCCCTGCCCCT	10	CGTGTGAAAGAAGCCAA	9	GGGCGGTGTCACCCCCAT	12	GAGGAGATAGAAACTGGC	10
8	chr11	57508595	57508944	7.54123	8.3041e-05	AGTCTCCGCCCCTTCCT	10	GGCTAGCAGTCGGACCT	10	CGCCAAACTCTCCTCCCT	11	CACCACCTAACAACATGT	10
9	chr22	38851920	38852266	7.53517	0.000401189	GCGCTCCTCCCAGAACC	12	GGCCTCAAGCCCCCTCC	10	GGCCTCAAGCCCCCTCCC	12	ACCCGGGCAGGATCCAGG	11
10	chr1	184020648	184020954	7.36082	1.04946e-05	GCGCTCCTCCATGCCGG	11	TGCATCAGCCCCTCCTT	10	AACCTGCGCGAACGCTCT	10	ACGCAGAGCGAAACTAGA	12
11	chr2	113875235	113875590	7.28905	1.36281e-12	GGGCTCCTCCTTGTACT	17	GGCATCAAGTCAGCCAT	17	AGCCTGAGTCACCCTCCT	18	ACGCAGATAAGAACCAGT	18
12	chr7	141437886	141438254	7.01642	8.46804e-15	GATCTTCTCTTTGTGCG	11	TGGATCAACGCCGCCAA	11	AACCCGAGCAGCCCAGCC	10	ACAAAGAGAAGATCGCGG	11
13	chr1	179851712	179852045	6.97871	0.000146221	CGGCTCGTCCGAGAACC	11	CGCATCGCTGCTGCCGC	9	AGCCGGCCCCTTCCCTCT	10	TCGCAGAATCGGACCGGA	11
14	chr17	49230689	49231059	6.4723	0.000290002	CGCTTCCTCTTGGGAGT	10	CGAAGGAAGTGAGTCAG	10	AACGTGTGAGCGCCACCT	10	GAGAAGAAAGCAAGCAGC	10
15	chr22	22337087	22337393	5.74164	0.000443346	GCTCCGGTCCTTGTTCC	10	CGCGTCCGGTGTGCCAG	10	GGGCTGCGGGACCCTCGC	11	CCGCACCGCGGATCCAGC	10
16	chr16	1854065	1854366	5.52076	3.26223e-05	CTGAACTTCCTTGTTCC	10	GGCAATGAATCTGTTAA	9	AACCATCGTCACCCACCA	12	ACAAAACTAAGACGCCAT	10
17	chr1	227922881	227923221	5.25353	3.03007e-08	GGCGCCCTGCGTCTTCT	10	TCCCTCAGGTGAGCGAC	10	GGGTCGAAGGACCCTCCT	11	ATCCAGCTCAGCACGGGT	11
18	chr13	95201659	95202051	5.2033	3.29495e-07	GCGCGGCAGCTTCTTCT	10	GGGATCGAACCAGGGAC	10	TTCCTCCTTCACCCTTCA	11	AGGAGGAAATGAAACAGT	12
19	chr17	8126124	8126434	5.19074	4.95056e-05	GGGCTCGTCCGGGATTT	11	TACAGCAAGCCTGGCAC	10	AGCGAGAATCATACCCCT	12	ATGCATAGTGGACCCAGC	11
20	chr8	96281718	96282117	4.67593	6.97258e-05	TCGCTCATCATTTTACA	11	CGCAAAAATTCACACAG	10	CGCCTTAACCACTCGGCC	10	GCGCAGGTTCGAATCCTG	10
21	chr19	4723935	4724403	4.46797	5.70635e-05	GGTCAACTGCTTGGAAG	10	GCTTGGAAGGCAGCTAT	10	AGGGAGAGACACCCCCCT	13	GCCCTGATAGGTAGCATC	10
22	chr6	26568939	26569315	4.40434	8.06477e-05	TGGATGCTTGTCGTCCT	10	GACATCCACTACCCCTT	10	CGAAGGATTCACACGACT	10	AGCCGGATTCGAACCAGC	12
23	chr17	19091277	19091648	4.12467	2.76725e-12	TCGCTCCTGCTTGGCAT	11	AGCGTGAAGCCGGCTTT	10	AGCCGGCTTCACGCTCAG	12	ACGGAGAGAAGAACGATC	13
24	chr6	27198047	27198428	4.09916	7.87981e-05	CGCCTCTTCCCACAATT	9	CTTAACCACTCAGCCAT	11	ATCTTAAGTCCAACGCCT	11	GCTTACATAAAAACTAAT	11
25	chr1	46153365	46153954	3.9844	4.12093e-06	GGACTCATTTTTTTTCA	10	GGCTCCCAGGCAGCAGA	10	GGCCTTATAAACCCTGTT	11	ATGGATGTAAGAACTGGG	11
26	chr6	27655777	27656133	3.63238	0.000416736	GAGCTCCACATTGAACA	12	GGCATCCTGTCATCCGG	12	TGTCTGGGTTACTATCCA	11	TTCCCCGTAAGAAGCAGG	10
27	chr1	167683811	167684264	3.51897	4.22572e-05	GAGCGGCTCGTTGGTCT	11	AGCTTCCCTTCAGCCTT	11	AGCGAGAATCATACCCCT	12	AATCAGAGGACACGCAGT	11
28	chr1	161424266	161424623	3.26599	8.3118e-07	CGCCTCTCCCTGGTGGT	10	GGCAACCGGCCTGCCCT	11	AGCCACAACCTCCCGCGG	10	CGGGAGAAGCGAGCCAGC	10
29	chr1	161431667	161432013	3.01095	1.28268e-08	CGCCTCTCCCTGGTGGT	10	AGAAGCGAGCCAGCCTG	10	AGCCACAACCTCCCTCGG	11	CGGGAGAAGCGAGCCAGC	10
30	chr1	161416875	161417243	2.98701	1.91278e-08	CGCCTCTCCCTGGTGGT	10	GGCAACCGGCCTGCCCT	11	AGCCACAACCTCCCTCGG	11	CGGGAGAAGCGAGCCAGC	10
31	chr2	33141236	33141656	2.08338	0.000427363	GCCCGCCCGCAAGTACG	9	GCCCGCAAGTACGCCCG	10	CCCCTCCCTCCCCCCCCC	10	CCGCCGGAAGGAAGGCAG	8
32	chr1	168318107	168318447	1.93611	0.000177464	GCGCTGCACCCACTAAC	9	GACATGAACTCATCATT	11	AGAGTGTGATATTCCCCT	10	GTGCAGGTTAGTTACATA	9
	Supplemental Table 8. DNA-binding sites of TALE-VP64s targeted to the IL1RN gene as determined by ChIP-Seq

## Sheet: ST9
	ChIP-Seq Data					Motif Search
site #	chr	start	stop	fold increase	pvalue	Best fit to gRNA A	# matches	Best fit to gRNA B	# matches	Best fit to gRNA C	# matches	Best fit to gRNA D	# matches
1	chr2	113875215	113875521	131.699	2.24804e-11	TGTACTCTCTGAGGTGCTC	19	CATCAAGTCAGCCATCAGC	19	GAGTCACCCTCCTGGAAAC	19	ACGCAGATAAGAACCAGTT	19
2	chr10	85677239	85677555	27.6001	1.66874e-09	CACTTCCTCTGAGGTGCTC	13	GAGGAAGTGAGACAACACG	11	GAGCAAAATCTAAGGCAAA	8	CTTCTGTTGAGATGCACGC	8
3	chr1	36621108	36621418	26.9123	3.5141e-06	TGTGTCTTCCCTGCTCCTC	10	CCCCAGCCCAGCCATCAGC	14	TAATTACCCCCAGAGGAGC	10	GGGCCGCTTTGGTTTAGGT	8
4	chr15	68132356	68132657	22.8528	2.25373e-05	TGTGCTGCCGAAGCGAGCA	8	GCCAAGGTCGGGCAGGAAG	8	CCCTCTTCCTGCCCGACCT	8	TAGAAAGTAATAATTTCTT	9
5	chr12	51477208	51477686	19.6854	2.47897e-08	GGCCGTCGCCGCGGGGCCC	10	CCTCTCTTCCCCCATTAAA	10	GAGCTGCCGCCTCGGGAGC	10	GCCCAGCCGGCAGGCAGAG	8
6	chr2	10243368	10243687	17.8475	3.07814e-08	CAGCTGTCCTGAGGTGCTC	11	TCCTCAGTTTCCCAGGAAC	8	TCCTCAGTTTCCCAGGAAC	10	AGGAAGTGGAGGGACAGGT	10
7	chr6	36557995	36558337	16.6781	2.37419e-10	GCTCAGGACTGTGCTAATC	8	GATTAGCACAGTCCTGAGC	11	CTTCTTCCCTCCTGGAAAC	13	GCTCAGGACTGTGCTAATC	8
8	chr17	17615052	17615404	15.855	9.96845e-05	GGCCCCAGATGTGGTGCGC	10	CCGCGTGACAGCCATCAGC	14	GAGCCAGCATTTGAGAATC	11	TTCAAGAGAAGCTGGAATT	9
9	chr11	82867522	82867853	15.3767	1.27765e-08	CTTAGCGTCTCAGGTGCTC	13	CCACTTCCCAGTTCCCAGA	8	CAGCTGCCCCTCTGGGAAC	12	TAGCAGCTACGGGGCAGGC	10
10	chr1	46598820	46599236	12.4906	6.73307e-05	TCTGCCCGGTGATTGGCCG	9	GGGCGGACCAAGCCTCAGC	9	GCTCAAACTGCCTGGAGAC	11	AAGCGGGACAAAGGCAGAA	9
11	chr20	34042922	34043252	12.0843	1.6198e-05	GGGCAGGTGGGAGGTGCTC	11	CAACTAGCCGGGCGTCTGC	12	GCAGCGGCCTCTTGTTACC	10	CCGCTGCTAAGGCCCTGCG	11
12	chr20	56533118	56533424	11.2671	0.000131008	CTCTCTCTCTTTGTTCAAA	8	CAGGCTTGAAGCCATCAGC	12	TTGAGATCATTATCATAAA	7	ACAAAGAGAGAGAGGCCTC	8
13	chr14	65229025	65229380	11.0055	7.82077e-08	GCTGCTGGGGGAGGTGCTC	12	CTGCCAGGGAGGCTGCTGC	10	CAGCCAGACACCGGCCAAG	10	TGCCAGGGAGGCTGCTGCT	8
14	chr11	66462114	66462544	10.5101	9.69465e-05	TTCAATCTTTTAGATTCGC	11	CAGTGCGCAAGAGATCCGG	9	GAGACAATGAATTGATAAT	9	AGGAGGAAGAAAAGCACCT	10
15	chr7	5598387	5598799	9.82191	1.19924e-05	GGGGGACTTGCAAGCCCTC	8	GGACTTGCAAGCCCTCGGG	9	TTGACAGACACATGGCTGG	8	GCCCAAAGAAGCAGGAATG	10
16	chr15	99393624	99393942	9.75403	1.9374e-06	AGGCCTCTCTGAGGTGCTC	16	TGTGGGTTCTGCAGACACC	8	TAGCCATGTCCTCGGAAGA	9	CAGCAAACCATGCCAGCTG	7
17	chr1	94490755	94491169	9.56514	4.64898e-06	CAAGGTGACTGAGGTGCTC	12	TGGCAGGTGAGCTCAGAGA	9	GAGGTGCTCGCCGAGAGAC	11	CCACACACATCGGCCACAT	9
18	chr16	57841109	57841422	9.24242	2.44089e-06	CAGACCCCCTGAGGTGCTC	14	TTTGCATGTCACCAACTGC	8	GACTCACCCTGAGCACCTC	10	AGCCCCATAAGCATGAATT	11
19	chr2	61847691	61847996	9.23335	3.45735e-06	CACACAGGCTGACCTCAGC	8	CACACAGGCTGACCTCAGC	12	TCATGACTCATCTGCACAC	10	ATGTTGTAAAGAAGCCCTC	10
20	chr10	60144983	60145580	8.03985	2.00322e-05	TCTAGCCTGCGGAGGGCTC	11	TGGGAAATCTGCTAACATC	10	GGGTCACTGCCTCATCCAC	9	GCGTTTCTCCGAAGCATGT	9
21	chr17	60500901	60501397	7.69007	4.87813e-06	TCTGGTCCGGGTGGCGCTC	11	GAGGATCCCAGCATTGAAC	9	GAGGCAGCAGTTCGGAAGC	11	CCGATAAGAGGCAGCAGTT	11
22	chr11	46260702	46261021	7.57756	3.5854e-05	AGTCCCCATTGCAGAACTG	9	TCTGAGTCCAGGCGTCTGC	10	ACGTCGGCCTGCAGACGCC	9	CCTCAGTCGGGATGGAGCG	8
23	chr17	71830020	71830325	7.09628	0.000210227	TGGGACCCCCCACCTGGCC	8	CCGAGAGCCAGCCATCAGC	14	GGGACCCCCCACCTGGCCA	8	GCAGTGAGCGGAAGAAGCT	9
24	chr1	113243341	113243689	7.02894	0.000205	GGGACTTTCAGCCCTGCTG	11	AAGCAGGCCAGTGGCCAGC	11	ACTCCACCCTGCTGGCCAC	12	CCCCTAAGCTGACCCTGTA	9
25	chr7	28725487	28725817	6.50062	3.31738e-05	CTTCTTTTGCGCCTAGCTC	8	AAGTGAGCGAGAGCCCAGC	9	CACTAGCACTGAGCTAAAA	8	ACTGAGCTAAAAAGGAGAA	11
26	chr16	30996373	30996953	5.94426	5.97455e-05	GTTACTGCTGGAGGTGCCC	12	CCGTAACTCAGCCATCAGC	15	GGGTCTCTGTTCCTGGAAT	10	ACGGAGAGAGGGGCGGGCT	11
27	chr10	102757388	102757747	5.79309	0.000135023	TCCATTCTCCGCCTGGAGC	9	CCCCAACCCAACCACGGGG	10	TAAGCCCTCTCCCGGGAAC	12	GCGGAAATCCACCCTAGTC	9
28	chr22	36425200	36425504	5.76373	0.000192221	TGGGCACTCTGTGAGAGGC	10	AAAAATGTCTCAAATTGGA	8	GAGCCACTCCCTGGCCTTC	10	AAGAAAAAATGTCTCAAAT	9
29	chr19	16695085	16695421	5.40784	0.000160761	GGCTGCTTCTGAGGGGTGC	10	CACAGAGACAGCCTGAGGG	10	ACCTCATTCTCCCACACCC	9	GCACCCCTCAGAAGCAGCC	10
30	chr1	145243346	145243673	4.96755	8.72467e-05	ACTACTTTCTAACCTACAA	10	CGTAAGGTAAGCTCTGATC	11	ACTGCACAGACCTCCCAAC	9	GCTCTCCTAAGAACCAGTT	14
31	chr1	144994771	144995120	4.78393	7.81537e-05	GGAGCTCTCTCCGGGACTC	12	CAGCATGAAGCCAGCCGGC	9	GGAGCTCTCTCCGGGACTC	11	AGCATGAAGCCAGCCGGCT	8
32	chr1	234745953	234746504	4.31659	0.000243125	TGCACGTGGTGCTGGGCTT	10	CCTCACTTCGCGCCCCACC	10	CCGTCAGTCTCCTGAGAAT	12	GGGGAATTTAGGTCTAGCG	8
	Supplemental Table 9. DNA-binding sites of dCas9-VP64 targeted to the IL1RN gene as determined by ChIP-Seq

## Sheet: ST10
	ChIP-Seq Data					Motif Search
site #	chr	start	stop	fold increase	pvalue	Best fit to TALE A	# matches	Best fit to TALE B	# matches	Best fit to TALE C	# matches	Best fit to TALE D	# matches
1	chr11	5276053	5276369	37.4811	1.07245e-22	GACTATTGGTCAAGTTT	10	GCCTTGACCAATAGCCTT	18	CTGTCTGAAACGGTCCCT	18	ATCCTCTTGGGGGCCCCT	18
2	chr11	5271114	5271418	32.6285	1.35516e-30	GGCTAGGGATGAAGAAT	17	GCCTTGACCAATAGCCTT	18	CTGTCTGAAACGGTCCCT	18	ATCCTCTTGGGGGCCCCT	18
3	chr11	31896139	31896464	14.2648	9.94048e-14	GGGGAAGCAGGCAGAAG	10	TGCTTCCCCTGTCACCTT	10	ATGTCCTCAGCTGCCCCT	11	GTCACCTTAGGGGCCCCT	14
4	chr6	12482650	12482970	6.32893	4.42527e-09	GGGAAGAAAGCAAGAAT	11	TTCTTCCCCATCACCCCT	10	CTGTTTCAAAGGTTACTT	12	GTCCTATAGGGGGCCCCT	15
5	chr2	97508018	97508336	6.31677	9.14183e-06	AAGAAGAGAAGAAGAAG	10	GCCTCAGGGATTAGCCAC	10	TGTTTTCTAAGGGTTCCT	10	AGCCTCTTGGGGGCCCCT	17
6	chr12	107722372	107722750	6.09709	3.4556e-05	GGTTATGGTTGATGATT	12	GATTTCACCACTGGGCTG	11	CTGGATCATAGGGGCCCC	11	ATCCTCCTGGGGGCCCCT	17
	Supplemental Table 10. DNA-binding sites of TALE-VP64s targeted to the HBG1/2 genes as determined by ChIP-Seq

[truncated: 22 more sheets: ST11, ST12, ST13, ST14, ST15, ST16, ST17, ST18, ST19, ST20, ST21, ST22, ST23, ST24, ST25, ST26, ST27, ST28, ST29, ST30 …]
